# Supplementary material for: Quantification of cytosolic interactions identifies Ede1 oligomers as key organizers of endocytosis
Source: PubMed Central journal article supplement (PMC4299599; doi:10.15252/msb.20145422), 2014-11-03
Supplement: msb0010-0756-sd1.pdf [file msb0010-0756-sd1.pdf]

Figure S1

Boeke et al. 2014

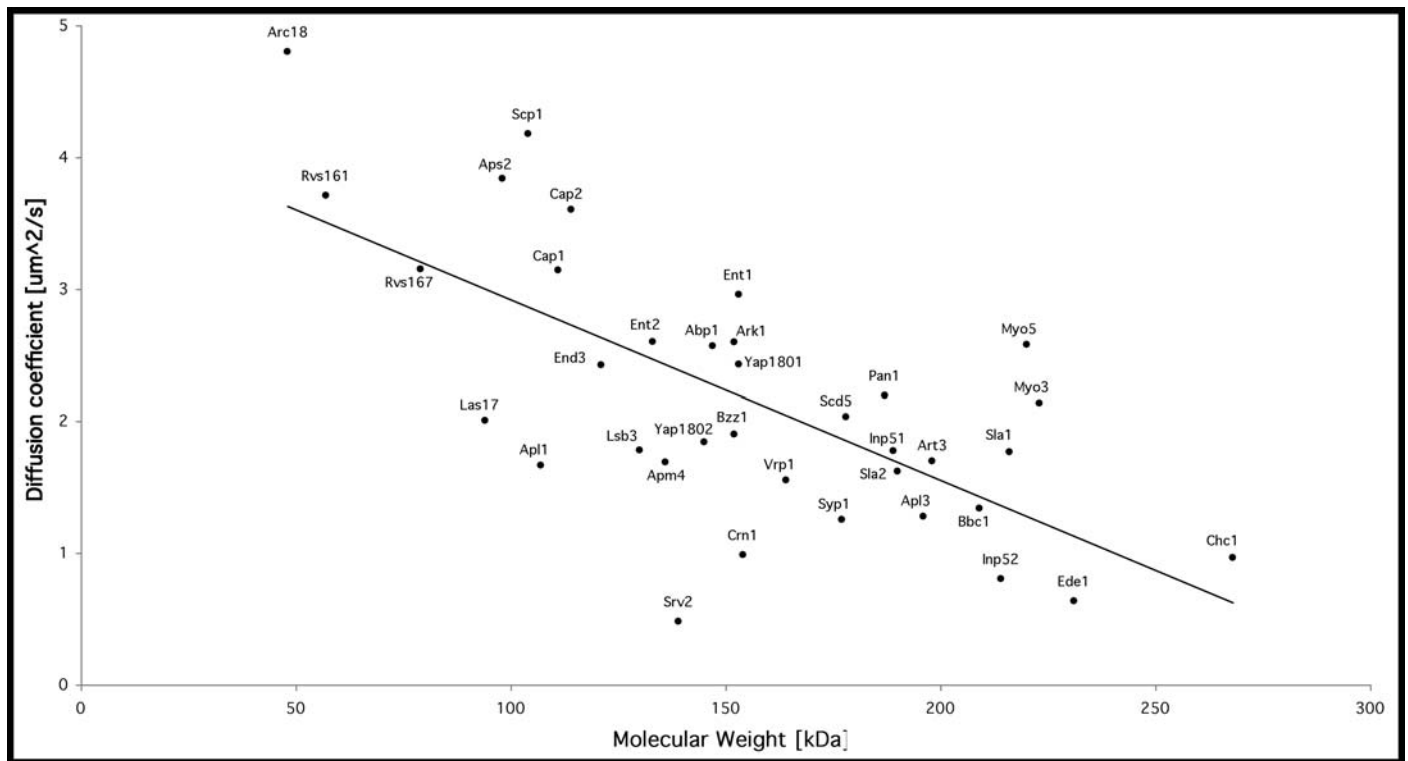

**Figure S1.** Diffusion coefficient measured by FCS of the indicated proteins plotted as a function of molecular weights, considering the tagged variants of the proteins.
