# Supplementary material for: Quantification of cytosolic interactions identifies Ede1 oligomers as key organizers of endocytosis
Source: PubMed Central journal article supplement (PMC4299599; doi:10.15252/msb.20145422), 2014-11-03
Supplement: msb0010-0756-sd3.pdf [file msb0010-0756-sd3.pdf]

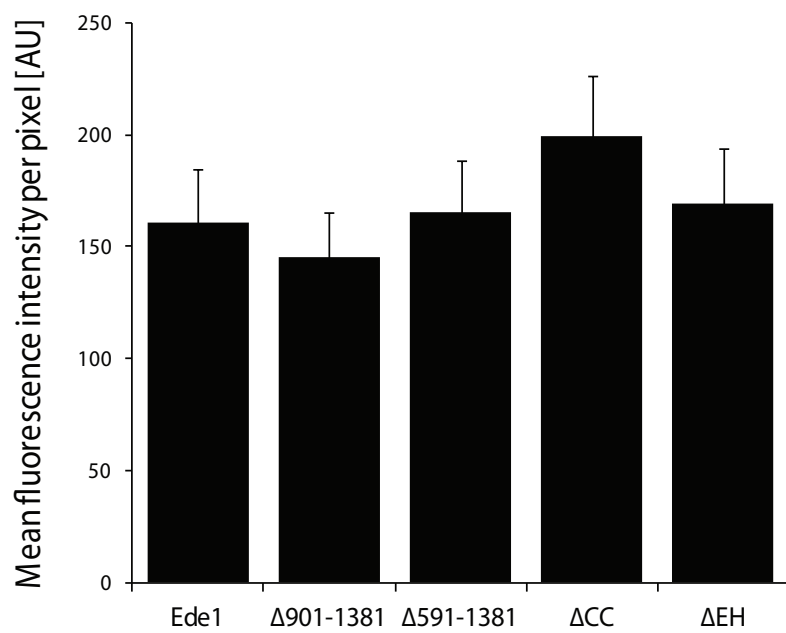

**Figure S3.** Mean Fluorescent intensity per pixel in whole cells harbouring Ede1-1myEGFP and different *ede1* mutants tagged with 1myEGFP. At least 22 cells were measured for each strain. Error bars represent standard deviation.
