# Supplementary material for: Quantification of cytosolic interactions identifies Ede1 oligomers as key organizers of endocytosis
Source: PubMed Central journal article supplement (PMC4299599; doi:10.15252/msb.20145422), 2014-11-03
Supplement: msb0010-0756-sd5.pdf [file msb0010-0756-sd5.pdf]

*ede1*<sup>Δ591-1391</sup>-3myEGFP/*ede1*<sup>Δ591-1391</sup>-mCherry

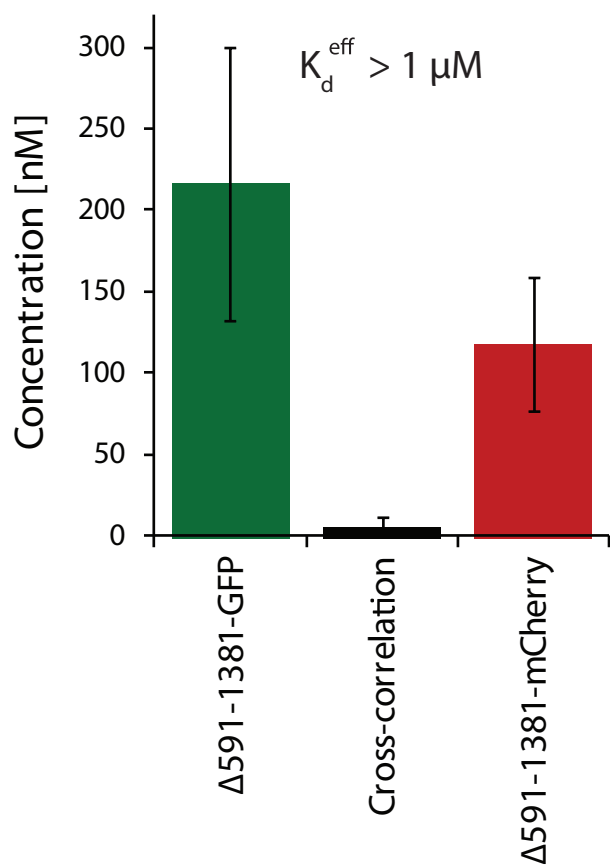

*ede1*<sup>Δ591-1391</sup>-TAP/Ede1-GFP

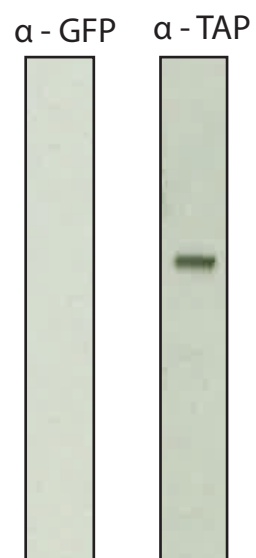

**Figure S5.** Left panel: Tandem affinity purification of a diploids *ede1* <sup>$\Delta$ 591-1391</sup>-TAP/Ede1-eGFP strain. Purified proteins were subject to SDS-PAGE and were immunoblotted with  $\alpha$ -GFP to detect Ede1-eGFP and  $\alpha$ -TAP to detect Ede1-TAP. Right panel: FCCS measurements of *ede1* <sup>$\Delta$ 591-1381</sup>-3myeGFP/ *ede1* <sup>$\Delta$ 591-1381</sup>-mCherry. Measurements were performed in 40 individual cells. Error bars represent standard deviation.
