# Supplementary material for: Quantification of cytosolic interactions identifies Ede1 oligomers as key organizers of endocytosis
Source: PubMed Central journal article supplement (PMC4299599; doi:10.15252/msb.20145422), 2014-11-03
Supplement: msb0010-0756-sd6.pdf [file msb0010-0756-sd6.pdf]

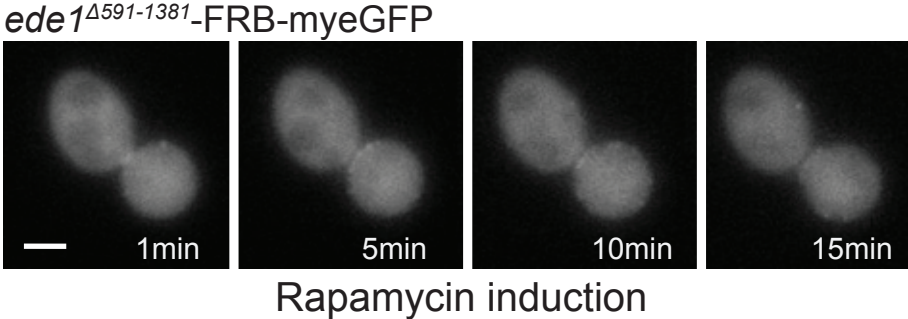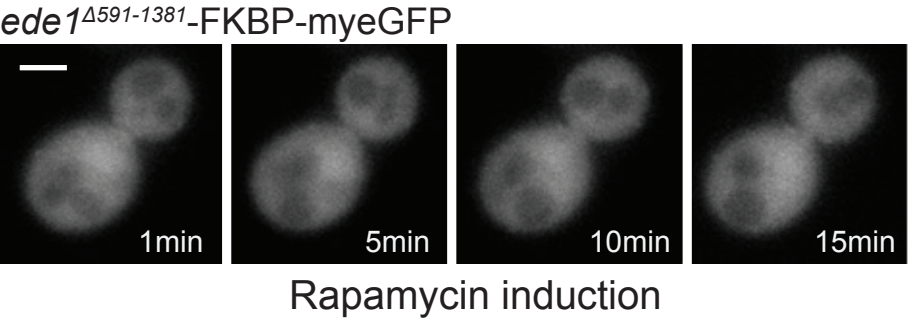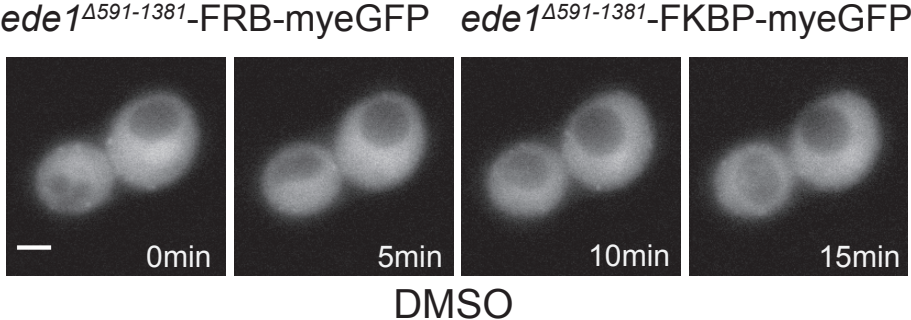

**Figure S6.** Time lapse microscopy of haploid *ede1 $\Delta$ 591-1381*-FRB-myeGFP and *ede1 $\Delta$ 591-1381*-FKBP-myeGFP cells after rapamycin treatment and of a diploid *ede1 $\Delta$ 591-1381*-FRBmyeGFP/*ede1 $\Delta$ 591-1381*-FKBP-myeGFP after addition of DMSO as a control. Scale bar is 2  $\mu$ m.
