# Supplementary material for: Quantification of cytosolic interactions identifies Ede1 oligomers as key organizers of endocytosis
Source: PubMed Central journal article supplement (PMC4299599; doi:10.15252/msb.20145422), 2014-11-03
Supplement: msb0010-0756-sd7.pdf [file msb0010-0756-sd7.pdf]

Figure S7

Boeke et al. 2014

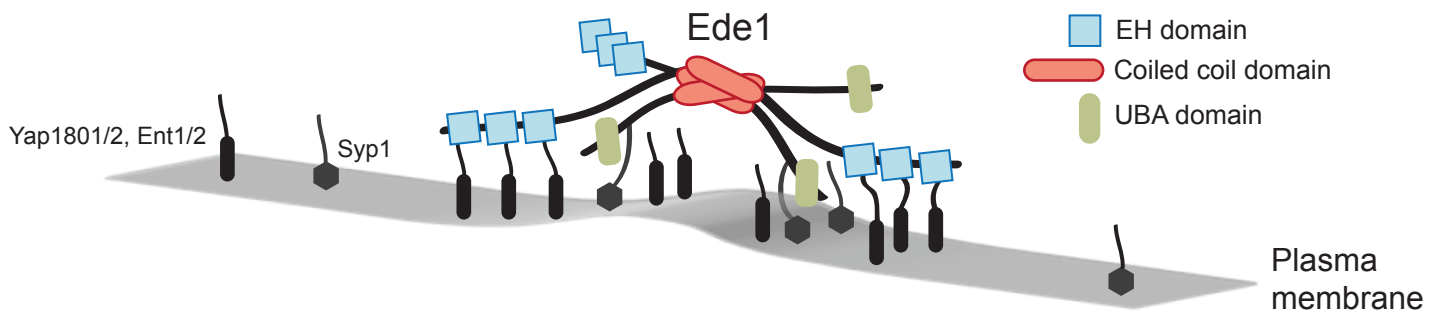

**Figure S7.** Model of Ede1 and its interaction with endocytic adaptors. Oligomerization of Ede1 through its coiled coil domain and binding of Ede1 to endocytic adaptors locally increases the concentration of adaptors at the endocytic site.
