# Supplementary material for: Quantification of cytosolic interactions identifies Ede1 oligomers as key organizers of endocytosis
Source: PubMed Central journal article supplement (PMC4299599; doi:10.15252/msb.20145422), 2014-11-03
Supplement: msb0010-0756-sd8.pdf [file msb0010-0756-sd8.pdf]

**Table S1** - Overview of FCS data presented in this study (corresponding to Fig.1)

|                        | Number of measurements | Particle concentration |     | Diffusion coefficient      |      |
|------------------------|------------------------|------------------------|-----|----------------------------|------|
|                        | N                      | nM                     | SD  | $\mu\text{m}^2/\text{sec}$ | SD   |
| <b>1myEGFP</b>         | 53                     | 1103                   | 376 | 8,72                       | 3,66 |
| <b>3myEGFP</b>         | 30                     | 1173                   | 272 | 5,72                       | 1,21 |
| <b>Abp1 3myEGFP</b>    | 5                      | 1206                   | 403 | 2,57                       | 0,47 |
| <b>Apl1 1myEGFP</b>    | 24                     | 33                     | 19  | 1,67                       | 0,46 |
| <b>Apl3 3myEGFP</b>    | 33                     | 47                     | 19  | 1,28                       | 0,63 |
| <b>Apm4 3myEGFP</b>    | 12                     | 32                     | 13  | 1,69                       | 0,47 |
| <b>Aps2 3myEGFP</b>    | 15                     | 88                     | 20  | 3,84                       | 1,40 |
| <b>Arc18 1myEGFP</b>   | 15                     | 368                    | 65  | 4,80                       | 1,27 |
| <b>Ark1 3myEGFP</b>    | 10                     | 16                     | 19  | 2,60                       | 1,49 |
| <b>Art3 3myEGFP</b>    | 14                     | 34                     | 10  | 1,70                       | 0,39 |
| <b>Bbc1 3myEGFP</b>    | 10                     | 78                     | 18  | 1,34                       | 0,35 |
| <b>Bzz1 3myEGFP</b>    | 22                     | 100                    | 16  | 1,90                       | 0,34 |
| <b>Cap1 3myeGFP</b>    | 8                      | 406                    | 133 | 3,14                       | 0,88 |
| <b>Cap2 3myEGFP</b>    | 10                     | 420                    | 120 | 3,60                       | 0,90 |
| <b>Chc1 3myEGFP</b>    | 5                      | 363                    | 175 | 0,96                       | 0,13 |
| <b>Crn1 3myEGFP</b>    | 15                     | 108                    | 27  | 0,99                       | 0,14 |
| <b>Ede1-3myGFP</b>     | 35                     | 138                    | 56  | 0,64                       | 0,15 |
| <b>End3-3myEGFP</b>    | 21                     | 87                     | 30  | 2,42                       | 0,96 |
| <b>Ent1 3myEGFP</b>    | 16                     | 171                    | 28  | 2,96                       | 0,62 |
| <b>Ent2 3myEGFP</b>    | 17                     | 183                    | 40  | 2,60                       | 0,73 |
| <b>Inp51 3myEGFP</b>   | 7                      | 24                     | 7   | 1,78                       | 0,47 |
| <b>Inp52 3myEGFP</b>   | 7                      | 47                     | 20  | 0,81                       | 0,17 |
| <b>Las17 1myEGFP</b>   | 28                     | 82                     | 24  | 2,01                       | 0,51 |
| <b>Lsb3 3myEGFP</b>    | 13                     | 335                    | 98  | 1,78                       | 0,64 |
| <b>Myo3 3myEGFP</b>    | 21                     | 172                    | 61  | 2,14                       | 0,45 |
| <b>Myo5 3myEGFP</b>    | 13                     | 152                    | 30  | 2,58                       | 0,39 |
| <b>Pan1 1myEGFP</b>    | 52                     | 140                    | 45  | 2,19                       | 0,71 |
| <b>Rvs161 1myEGFP</b>  | 23                     | 721                    | 217 | 3,71                       | 1,52 |
| <b>Rvs167 1myEGFP</b>  | 32                     | 354                    | 89  | 3,15                       | 1,07 |
| <b>Scd5 3myEGFP</b>    | 13                     | 31                     | 6   | 2,03                       | 0,34 |
| <b>Scp1 3myEGFP</b>    | 21                     | 163                    | 36  | 4,18                       | 0,85 |
| <b>Sla1 3myEGFP</b>    | 13                     | 427                    | 131 | 1,77                       | 0,28 |
| <b>Sla2-3myEGFP</b>    | 28                     | 116                    | 39  | 1,62                       | 0,37 |
| <b>Srv2 3myEGFP</b>    | 15                     | 162                    | 52  | 0,48                       | 0,10 |
| <b>Syp1 3myEGFP</b>    | 12                     | 45                     | 13  | 1,26                       | 0,24 |
| <b>Vrp1 3myEGFP</b>    | 9                      | 228                    | 52  | 1,56                       | 0,34 |
| <b>Yap1801 3myEGFP</b> | 20                     | 44                     | 17  | 2,43                       | 0,82 |
| <b>Yap1802 3myEGFP</b> | 24                     | 33                     | 13  | 1,84                       | 0,74 |

N denotes the number of single cell measurements. Each single cell measurement is considered to be one experiment. Particle concentration denotes the number of particles measured for 3myeGFP tagged proteins. SD represents the standard deviation.

**Table S2** – Overview of previously reported interaction with the corresponding reference

|        |         | <b>Reference</b>                                       |
|--------|---------|--------------------------------------------------------|
| Apl1   | Apl3    | Luo Y1, et al. 2010. J Am Soc Mass Spectrom. 21:34-46  |
| Ede1   | Yap1802 | Howard JP, et al. 2002. J Cell Biol. 157:315-26        |
| Ede1   | Syp1    | Reider, A. et al. 2009. EMBO J. 28:3103–16             |
| Ede1   | Ent1    | Aguilar, R.C. et al. 2003. J. Biol. Chem. 278:10737–43 |
| Ede1   | End3    | Gavin A.C., et al. 2006. Nature. 440:631-6             |
| Ede1   | Sla2    | Gavin A.C., et al. 2006. Nature. 440:631-6             |
| Pan1   | Yap1801 | Wendland B. and Emr S.D. 1998. J Cell Biol. 141:71-84  |
| Pan1   | Yap1802 | Howard J.P. et al. 2002. J Cell Biol. 157:315-26       |
| Pan1   | Scd5    | Zeng, G. et al. 2007. Mol Biol Cell. 18:4885-98        |
| Pan1   | End3    | Toshima, J. et al. 2007. Mol Biol Cell. 18:658-68      |
| Pan1   | Sla2    | Toshima, J. et al. 2007. Mol Biol Cell. 18:658-68      |
| Pan1   | Sla1    | Tang, H.Y. et al. 2000. Mol Cell Biol. 20:12-25        |
| Pan1   | Ent1    | Aguilar, R.C. et al. 2003. J Biol Chem. 278:10737-43   |
| Sla1   | Syp1    | Gavin A.C., et al. 2006. Nature. 440:631-6             |
| Sla1   | Scd5    | Tonikian R. et al. 2009. PLoS Biol. 7:e1000218         |
| Sla1   | End3    | Tang, H.Y. et al. 2000. Mol Cell Biol. 20:12-25        |
| Sla1   | Rvs167  | Stamenova, S.D. et al. 2004. J Biol Chem. 279:16017-25 |
| Sla1   | Bzz1    | Gavin A.C., et al. 2006. Nature. 440:631-6             |
| Sla1   | Las17   | Michelot, A. et al. 2010. Curr Biol. 20:1890-9         |
| Sla1   | Sla2    | Gourlay, C.W. et al. 2003. J Cell Sci. 116:2551-64     |
| End3   | Yap1802 | Howard J.P. et al. 2002. J Cell Biol. 157:315-26       |
| End3   | Scd5    | Zeng, G. et al. 2007. Mol Biol Cell. 18:4885-98        |
| End3   | Las17   | Gavin A.C., et al. 2006. Nature. 440:631-6             |
| End3   | Sla2    | Gavin A.C., et al. 2006. Nature. 440:631-6             |
| Rvs167 | Scd5    | Tonikian R. et al. 2009. PLoS Biol. 7:e1000218         |
| Rvs167 | Rvs161  | Navarro, P. et al. Biochim Biophys Acta. 1343:187-92   |
| Rvs167 | Las17   | Friesen H. et al. 2003. Mol Biol Cell. 14:3027-40      |
| Las17  | Bzz1    | Michelot, A. et al. 2010. Curr Biol. 20:1890-9         |
| Las17  | Bbc1    | Michelot, A. et al. 2010. Curr Biol. 20:1890-9         |
| Las17  | Sla2    | Gavin A.C., et al. 2006. Nature. 440:631-6             |
| Las17  | Rvs161  | Michelot, A. et al. 2010. Curr Biol. 20:1890-9         |
| Bzz1   | Bbc1    | Tonikian R. et al. 2009. PLoS Biol. 7:e1000218         |

**Self**

|        |  |                                                     |
|--------|--|-----------------------------------------------------|
| Apl3   |  | Babu, M. et al. 2012. Nature. 489:585-9*            |
| Ede1   |  | Wang Y. et al. 2012. Mol Biol Cell 23:3911-22       |
| Syp1   |  | Reider, A. et al. 2009. EMBO J. 28:3103–16          |
| Pan1   |  | Miliaras, N.B. et al. 2004. Traffic. 5:963-78.      |
| Sla1   |  | Di Pietro, S.M. et al. 2010. EMBO J. 29:1033-44     |
| Sla2   |  | Yang, S. et al. 1999 Mol Biol Cell. 10:2265-83      |
| Rvs167 |  | Lombardi, R. et al. 2001. J Biol Chem. 276:6016-22  |
| Las17  |  | Madania, A. et al. 1999. Mol Biol Cell. 10:3521-38. |
| Bbc1   |  | Krogan, N.J. et al. 2006. Nature. 440:637-43        |

\* The initial cut-off by Babu et al. 2012 indicated self-interaction of Apl3. However, further statistical analysis in the same study with a high confidence interaction network did not include the Apl3 self-interaction

**Table S3** - Overview of FCCS data presented in this study (corresponding to Fig.2)

|               | Number of Measurements | Particle concentration green |     | Particle concentration red |    | Complex        |    |                                    |
|---------------|------------------------|------------------------------|-----|----------------------------|----|----------------|----|------------------------------------|
|               | N                      | nM                           | SD  | nM                         | SD | nM             | SD | K <sub>d</sub> <sup>eff</sup> (nM) |
| Apl1-Apl1     | 11                     | 39                           | 16  | 26                         | 9  | No interaction |    |                                    |
| Apl1-Apl3     | 16                     | 47                           | 23  | 59                         | 23 | 23             | 13 | 37                                 |
| Apl1-Ede1     | 6                      | 37                           | 16  | 96                         | 18 | No interaction |    |                                    |
| Apl3-Apl3     | 13                     | 37                           | 13  | 39                         | 13 | No interaction |    |                                    |
| Apl3-Ede1     | 26                     | 71                           | 16  | 115                        | 37 | No interaction |    |                                    |
| Bbc1-Bbc1     | 13                     | 57                           | 16  | 73                         | 10 | 19             | 7  | 115                                |
| Bbc1-Sla1     | 11                     | 127                          | 41  | 245                        | 45 | No interaction |    |                                    |
| Bzz1-Bbc1     | 15                     | 81                           | 20  | 121                        | 26 | 8              | 3  | 994                                |
| Bzz1-Sla1     | 17                     | 81                           | 16  | 211                        | 54 | 14             | 10 | 976                                |
| Don1-Don1     | 17                     | 53                           | 12  | 46                         | 12 | 36             | 10 | 4                                  |
| Don1-Ste11    | 11                     | 43                           | 11  | 29                         | 6  | No interaction |    |                                    |
| Ede1-Ede1     | 28                     | 56                           | 13  | 47                         | 15 | 12             | 8  | 127                                |
| End3-Ede1     | 3                      | 87                           | 21  | 102                        | 20 | No interaction |    |                                    |
| End3-End3     | 8                      | 85                           | 56  | 64                         | 27 | No interaction |    |                                    |
| End3-Sla1     | 4                      | 36                           | 8   | 220                        | 46 | No interaction |    |                                    |
| Ent1-Ede1     | 11                     | 242                          | 50  | 101                        | 31 | No interaction |    |                                    |
| Ent1-Ent1     | 20                     | 87                           | 18  | 40                         | 9  | No interaction |    |                                    |
| Las17-Bbc1    | 20                     | 100                          | 24  | 135                        | 24 | 16             | 15 | 631                                |
| Las17-Bzz1    | 19                     | 78                           | 19  | 74                         | 15 | 9              | 4  | 475                                |
| Las17-End3    | 7                      | 45                           | 25  | 99                         | 31 | 8              | 6  | 438                                |
| Las17-Las17   | 2                      | 32                           | 9   | 43                         | 2  | No interaction |    |                                    |
| Las17-Rvs161  | 5                      | 54                           | 10  | 311                        | 23 | No interaction |    |                                    |
| Las17-Sla1    | 20                     | 107                          | 38  | 156                        | 45 | 32             | 15 | 286                                |
| Las17-Sla2    | 7                      | 73                           | 41  | 84                         | 23 | No interaction |    |                                    |
| Pan1-End3     | 34                     | 123                          | 27  | 105                        | 25 | 70             | 18 | 27                                 |
| Pan1-Ent1     | 6                      | 110                          | 61  | 158                        | 56 | No interaction |    |                                    |
| Pan1-Pan1     | 17                     | 73                           | 17  | 75                         | 21 | No interaction |    |                                    |
| Pan1-Sla1     | 9                      | 140                          | 46  | 163                        | 32 | No interaction |    |                                    |
| Rvs161-Rvs161 | 10                     | 197                          | 38  | 160                        | 21 | No interaction |    |                                    |
| Rvs167-Rvs161 | 9                      | 211                          | 40  | 274                        | 51 | 196            | 50 | 6                                  |
| Scd5-End3     | 4                      | 39                           | 13  | 102                        | 33 | No interaction |    |                                    |
| Scd5-Pan1     | 16                     | 51                           | 15  | 162                        | 39 | No interaction |    |                                    |
| Scd5-Scd5     | 22                     | 23                           | 5   | 40                         | 15 | No interaction |    |                                    |
| Scd5-Sla1     | 5                      | 39                           | 11  | 356                        | 45 | No interaction |    |                                    |
| Sla1-Sla1     | 11                     | 361                          | 116 | 132                        | 40 | No interaction |    |                                    |
| Sla2-Ede1     | 11                     | 117                          | 24  | 100                        | 24 | 15             | 3  | 590                                |
| Sla2-End3     | 3                      | 185                          | 54  | 85                         | 24 | 18             | 6  | 622                                |
| Sla2-Pan1     | 5                      | 97                           | 21  | 109                        | 30 | 14             | 6  | 539                                |
| Sla2-Sla1     | 2                      | 202                          | 21  | 323                        | 0  | No interaction |    |                                    |
| Sla2-Sla2     | 19                     | 83                           | 19  | 58                         | 10 | 19             | 5  | 133                                |
| Syp1-Ede1     | 15                     | 24                           | 6   | 91                         | 27 | 7              | 3  | 227                                |
| Syp1-Sla1     | 7                      | 16                           | 5   | 128                        | 21 | No interaction |    |                                    |
| Syp1-Syp1     | 13                     | 16                           | 4   | 17                         | 8  | No interaction |    |                                    |
| Yap1801-Ede1  | 13                     | 45                           | 25  | 96                         | 27 | No interaction |    |                                    |
| Yap1801-Pan1  | 5                      | 49                           | 30  | 164                        | 31 | No interaction |    |                                    |
| Yap1802-Ede1  | 12                     | 50                           | 19  | 119                        | 38 | No interaction |    |                                    |
| Yap1802-End3  | 4                      | 34                           | 35  | 106                        | 16 | No interaction |    |                                    |
| Yap1802-Pan1  | 4                      | 33                           | 20  | 146                        | 41 | No interaction |    |                                    |

N denotes the number of single cell measurements. Each single cell measurement is considered to be one experiment. 'Particle concentration GFP' and 'Particle concentration mCherry' denote the number of particles measured for the 3myeGFP tagged proteins and 3mCherry tagged proteins, respectively. Only  $K_d^{eff}$ -values for values < 1000 nM are shown. SD represents the standard deviation.

**Table S4 – Yeast strains used in this study**

Strains generated for FCS/FCCS experiments in Fig. 1, Fig 2, Fig 3B and Fig. S1 were generated in the background strains BY4741 (myeGFP::natNT2 and 3myeGFP::natNT2) and Y8205 (3mCherry::hphNT1) and are not listed in this table.

| Strain           | Genotype                                                                                                                                                                                                                                           | Source                |
|------------------|----------------------------------------------------------------------------------------------------------------------------------------------------------------------------------------------------------------------------------------------------|-----------------------|
| BY4741           | MATa, <i>his3Δ1, leu2Δ0, met15Δ0, ura3Δ0</i>                                                                                                                                                                                                       | Brachmann et al. 1998 |
| Y8205            | MATα, <i>can1Δ::STE2pr-HIS5, lyp1Δ::STE3pr-LEU2, his3Δ1, leu2Δ0, ura3Δ0</i>                                                                                                                                                                        | Tong and Boone 2007   |
| MKY0532          | MATa, <i>his3200, leu2-3,112, ura3-52, lys2-801, yap1801Δ::natNT2, yap1802Δ::natNT2, apl3Δ::natNT2, EDE1-yeGFP::HIS3MX6</i>                                                                                                                        | Kaksonen lab          |
| MKY0172          | MATa, <i>his3-Δ200, leu2-3,112, ura3-52, lys2-801, EDE1-yeGFP::HIS3MX6</i>                                                                                                                                                                         | Kaksonen lab          |
| MKY2231          | MATa, <i>ura3-52, leu2Δ1, his3Δ200, trp1Δ63, DON1-eGFP::kanMX</i>                                                                                                                                                                                  | This study            |
| YCM452 (MKY2232) | MATa, <i>ura3-52, leu2Δ1, his3Δ200, trp1Δ63, natNT2::Pcyc-eGFP-DON1 STE11::3mCherry::hphNT1</i>                                                                                                                                                    | Maeder et al. 2007    |
| YCM449 (MKY2233) | MATa, <i>ura3-52, leu2Δ1, his3Δ200, trp1Δ63, natNT2::Pcyc::eGFP-DON1::3mCherry::KanMX6</i>                                                                                                                                                         | Maeder et al. 2007    |
| MKY2599          | MATa, <i>his3-Δ200, leu2-3, ura3-52, lys2-801, tor1-1, fpr1::klUra3, ede1<sup>Δ591-1381</sup>-FKBP-(24)-myeGFP::kanMX4</i>                                                                                                                         | This study            |
| MKY2602          | MATα, <i>his3-Δ200, leu2-3, ura3-52, lys2-801, tor1-1, Fpr1::klUra, ede1<sup>Δ591-1381</sup>-FRB-(24)-myeGFP::kanMX4</i>                                                                                                                           | This study            |
| MKY2612          | MATa/MATα, <i>his3-Δ200/his3-1, leu2-3/leu2-0, ura3-52/ura3-0, lys2-801/LYS, EDE1-eGFP::HIS3MX6/EDE1-TAP::URA3</i>                                                                                                                                 | This study            |
| MKY2620          | MATa, <i>his3-1, leu2-0, met15-0, ura3-0, Ede1-TAP::URA3</i>                                                                                                                                                                                       | This study            |
| MKY2669          | MATa, <i>his3-1, leu2-0, met15-0, ura3-0, ede1<sup>Δ591-1391</sup>-myeGFP::natNT2</i>                                                                                                                                                              | This study            |
| MKY2670          | MATa, <i>his3-1, leu2-0, met15-0, ura3-0, ede1<sup>Δ901-1391</sup>-myeGFP::natNT2</i>                                                                                                                                                              | This study            |
| MKY2671          | MATa/ MATα, <i>can1Δ::Ste2pr-Leu2/Can1+, lyp1::Lyp1+, his3-1/his3200, leu2-3/leu2-0, ura3-52/ura3-0, lys2-801/Lys2+, fpr1::klUra3/ fpr1::klUra3, ede1<sup>Δ591-1381</sup>-myeGFP-FRB(24)::kan/ede1<sup>Δ591-1381</sup>-myeGFP-FKBP(24)::kanMX4</i> | This study            |
| MKY1037          | MATa, <i>his3-Δ200, leu2-3,112, ura3-52, lys2-801, ADH<sub>pr</sub>yeGFP-EDE1::natNT2</i>                                                                                                                                                          | Kaksonen Lab          |
| MKY2812          | MATα, <i>his3-Δ200, leu2-3,112, ura3-52, lys2-801, tor1-1, fpr1Δ, EDE1-myeGFP::natNT2</i>                                                                                                                                                          | This study            |
| MKY0158          | MATa, <i>his3-Δ200, leu2-3,112, ura3-52, lys2-801, EDE1-myeGFP::kanMX4</i>                                                                                                                                                                         | Kaksonen lab          |
| MKY2814          | MATa, <i>his3Δ1, leu2Δ0, met15Δ0, ura3Δ0, ede1<sup>ΔEH</sup>-myeGFP::kanMX4</i>                                                                                                                                                                    | This study            |
| MKY2994          | MATa, <i>his3-Δ200, leu2-3,112, ura3-52, lys2-801, tor1-1, fpr1Δ, ede1Δ:: hphNT1, SYP1-3myeGFP::natNT2</i>                                                                                                                                         | This study            |
| MKY2997          | MATa, <i>his3-Δ200, leu2-3,112, ura3-52, lys2-801, tor1-1, fpr1Δ, ede1<sup>ΔCC</sup>, SYP1-3myeGFP::natNT2</i>                                                                                                                                     | This study            |
| MKY2819          | MATa, <i>his3Δ1, leu2Δ0, met15Δ0, ura3Δ0, EDE1<sub>pr1</sub>myeGFP::natNT2</i>                                                                                                                                                                     | This study            |
| MKY2820          | MATa, <i>his3Δ1, leu2Δ0, met15Δ0, ura3Δ0, EDE1<sub>pr3</sub>myeGFP::natNT2</i>                                                                                                                                                                     | This study            |
| MKY2931          | MATa/ MATα, <i>can1Δ::STE2pr-HIS5/CAN, lyp1Δ::STE3pr-LEU2/LYP, his3Δ1, leu2Δ0, met15Δ0/MET15+, ura3Δ0, ede1<sup>Δ591-1381</sup>-3myeGFP::natNT2 ede1<sup>Δ591-1381</sup>-mCherry::hphNT1</i>                                                       | This study            |
| MKY3012          | MATa, <i>his3Δ1, leu2Δ0, met15Δ0, ura3Δ0, ede1<sup>CC</sup>-myeGFP::kanMX4</i>                                                                                                                                                                     | This study            |

|                |                                                                                                                                                                                                                                                                                                                                                                  |            |
|----------------|------------------------------------------------------------------------------------------------------------------------------------------------------------------------------------------------------------------------------------------------------------------------------------------------------------------------------------------------------------------|------------|
| <b>MKY2953</b> | MATa/ MAT $\alpha$ , <i>his3-<math>\Delta</math>200</i> , <i>leu2-3</i> , <i>ura3-52</i> , <i>lys2-801</i> , <i>tor1-1</i> , <i>fpr1<math>\Delta</math></i> , <i>ede1<math>\Delta</math><sup>CC</sup></i> - <i>mCherry-FKBP(24)::natNT2/ede1<math>\Delta</math><sup>CC</sup></i> - <i>mCherry-FRB(24)::hphNT1</i> , <i>SYP1-3myeGFP::natNT2</i>                  | This study |
| <b>MKY2823</b> | MATa/ MAT $\alpha$ , <i>his3-<math>\Delta</math>200</i> , <i>leu2-3</i> , <i>ura3-52</i> , <i>lys2-801</i> , <i>tor1-1</i> , <i>fpr1<math>\Delta</math></i> :: <i>klUra3</i> , <i>ede1<math>\Delta</math><sup>591</sup></i> - <i>myeGFP-FKBP(24)::kanMX4/ede1<math>\Delta</math><sup>591</sup></i> - <i>myeGFP-FRB(24)::kanMX4</i> , <i>SLA1-mCherry::hphNT1</i> | This study |

**Table S5** - Plasmids used in this study

| Name            | Tag                       | Marker            | Origin                              |
|-----------------|---------------------------|-------------------|-------------------------------------|
| pST70 (pMK0051) | 3mCherry(dcu)             | <i>hphNT1</i>     | This study                          |
| pST72 (pMK0053) | 3myeGFP(dcu)              | <i>natNT2</i>     | This study                          |
| pMK0075         | 1myEGFP                   | <i>natNT2</i>     | This study                          |
| pMaM57          | 1mCherry                  | <i>hphNT1</i>     | This study                          |
| pGSKU-1         | -                         | <i>kanMX4/URA</i> | Storici and Resnick, 2006           |
| pMK0070         | myEGFP-FRB(24)            | <i>kanMX4</i>     | Oriol Gallego (Gallego et al. 2013) |
| pMK0074         | myEGFP-FKBP(24)           | <i>kanMX4</i>     | Oriol Gallego (Gallego et al. 2013) |
| pBS1539         | TAP                       | <i>URA</i>        | Puig et al. 2001                    |
| pKS133          | -                         | <i>hphNT1</i>     | Janke et al. (2004)                 |
| pKS134          | -                         | <i>natNT2</i>     | Janke et al. (2004)                 |
| pFA6-kanMX      | -                         | <i>kanMX4</i>     | Knop lab                            |
| pYM-N9          | ADH <sub>pr</sub> - yeGFP | <i>natNT2</i>     | Janke et al. (2004)                 |

dcu = different codon usage (for each repeat of the florescent protein)

## Supplementary References

Brachmann CB, Davies A, Cost GJ, Caputo E, Li J, Hieter P, Boeke JD (1998) Designer deletion strains derived from *Saccharomyces cerevisiae* S288C: a useful set of strains and plasmids for PCR-mediated gene disruption and other applications. *Yeast* **14**:115-32

Storici F, Resnick MA (2006) The delitto perfetto approach to in vivo site-directed mutagenesis and chromosome rearrangements with synthetic oligonucleotides in yeast. *Methods Enzymol* **409**:329-45

Gallego O, Specht T, Brach T, Kumar A, Gavin AC, Kaksonen M (2013) Detection and characterization of protein interactions in vivo by a simple live-cell imaging method. *PLoS One* **8**:e62195

Puig O, Caspary F, Rigaut G, Rutz B, Bouveret E, Bragado-Nilsson E, Wilm M, Séraphin B (2001) The tandem affinity purification (TAP) method: a general procedure of protein complex purification. *Methods* **24**:218-29
